# Supplementary material
Source: Research Square preprint supplement (doi:10.21203/rs.3.rs-9413472/v1)
Supplement: Supplementary file 1 [file 715686b9bad1f4c7f7c99a25.docx]

SUPPLEMENTARY MATERIALS

Table 1. Results of the quality assessment using the CCAT for studies during races and time trials.

|  | Study (races) | Study assessment domains | | | | | | | | |
| --- | --- | --- | --- | --- | --- | --- | --- | --- | --- | --- |
| Nb | Preliminaries | Introduction | Design | Sampling | Data collection | Ethical matters | Results | Discussion | Over all score |
| 1 | Barroso et al. [10] | **4** | **5** | **3** | **2** | **3** | **4** | **3** | **4** | **28** |
| 2 | Barroso et al. [11] | **5** | **5** | **4** | **5** | **4** | **3** | **4** | **5** | **35** |
| 3 | Cuenca-Fernàndez et al. [35] | **5** | **5** | **3** | **3** | **5** | **5** | **4** | **5** | **35** |
| 4 | Demarie et al. [12] | **5** | **5** | **4** | **4** | **4** | **5** | **5** | **5** | **37** |
| 5 | Demarie et al. [13] | **5** | **5** | **4** | **4** | **4** | **5** | **4** | **5** | **36** |
| 6 | Garland Fritzdorf et al. [14] | **4** | **4** | **3** | **2** | **3** | **4** | **4** | **4** | **28** |
| 7 | Gatta et al. [50] | **5** | **5** | **4** | **3** | **5** | **5** | **5** | **4** | **36** |
| 8 | Gonjo et al. [44] | **5** | **5** | **3** | **3** | **4** | **5** | **5** | **5** | **35** |
| 9 | Hellard et al. [15] | **5** | **5** | **5** | **3** | **5** | **4** | **5** | **5** | **37** |
| 10 | Holub et al. [16] | **5** | **5** | **3** | **3** | **4** | **5** | **5** | **4** | **34** |
| 11 | Lara & Del Coso [17] | **5** | **4** | **3** | **4** | **4** | **5** | **5** | **5** | **35** |
| 12 | Lipinska et al. [18] | **5** | **4** | **4** | **3** | **3** | **3** | **5** | **4** | **31** |
| 13 | Lipinska et al. [19] | **5** | **5** | **4** | **3** | **3** | **5** | **5** | **5** | **35** |
| 14 | Lipinska & Hopkins [20] | **4** | **5** | **4** | **3** | **3** | **5** | **5** | **5** | **34** |
| 15 | Loisel et al. [33] | **5** | **5** | **4** | **3** | **4** | **3** | **5** | **5** | **34** |
| 16 | Lopez-Belmonte et al. [39] | **5** | **5** | **3** | **2** | **3** | **4** | **4** | **5** | **31** |
| 17 | Mauger et al. [22] | **5** | **5** | **4** | **3** | **4** | **4** | **5** | **5** | **35** |
| 18 | Mc Gibbon et al. [23] | **5** | **5** | **4** | **4** | **3** | **5** | **5** | **5** | **36** |
| 19 | Mc Gibbon et al. [24] | **5** | **5** | **4** | **3** | **3** | **5** | **4** | **5** | **34** |
| 20 | Morais et al. [25] | **5** | **5** | **4** | **3** | **4** | **4** | **5** | **5** | **35** |
| 21 | Morais et al. [26] | **5** | **5** | **4** | **3** | **4** | **4** | **5** | **5** | **35** |
| 22 | Morais et al. [4] | **5** | **5** | **4** | **3** | **4** | **4** | **5** | **5** | **35** |
| 23 | Morais et al. [27] | **4** | **5** | **4** | **2** | **4** | **5** | **5** | **5** | **34** |
| 24 | Morais et al. [37] | **4** | **5** | **4** | **3** | **5** | **5** | **5** | **5** | **36** |
| 25 | Morais et al. [42] | **4** | **5** | **4** | **2** | **5** | **5** | **5** | **5** | **35** |
| 26 | Mytton et al. [28] | **5** | **5** | **4** | **3** | **3** | **4** | **5** | **5** | **34** |
| 27 | Mytton et al. [29] | **5** | **5** | **3** | **3** | **3** | **5** | **5** | **5** | **34** |
| 28 | Oliveira et al. [38] | **5** | **5** | **3** | **4** | **5** | **5** | **5** | **5** | **37** |
| 29 | Robertson et al. [30] | **5** | **5** | **4** | **2** | **3** | **4** | **5** | **5** | **33** |
| 30 | Saavedra et al. [31] | **5** | **5** | **3** | **2** | **3** | **4** | **4** | **5** | **31** |
| 31 | Simbana et al. [2] | **5** | **5** | **4** | **2** | **4** | **5** | **5** | **5** | **35** |
| 32 | Simbana et al. [5] | **5** | **5** | **4** | **2** | **4** | **5** | **5** | **4** | **34** |
| 33 | Skorski et al. [40] | **5** | **5** | **4** | **4** | **3** | **5** | **5** | **5** | **36** |
| 34 | Thompson et al. [43] | **5** | **5** | **4** | **2** | **5** | **3** | **5** | **5** | **34** |
| 35 | Veiga et al. [49] | **5** | **5** | **4** | **4** | **3** | **5** | **5** | **5** | **36** |
| 36 | Veiga & Roig [34] | **5** | **5** | **3** | **3** | **3** | **5** | **5** | **5** | **34** |
| 37 | Yang et al. [32] | **5** | **5** | **4** | **3** | **3** | **5** | **5** | **5** | **35** |
| 38 | Staunton et al. [36] | **5** | **5** | **4** | **4** | **4** | **5** | **5** | **5** | **37** |

|  | Study (time trials) | Study assessment domains | | | | | | | | |
| --- | --- | --- | --- | --- | --- | --- | --- | --- | --- | --- |
| Nb | Preliminaries | Introduction | Design | Sampling | Data collection | Ethical matters | Results | Discussion | Over all score |
| 1 | Costa et al. [41] | **5** | **5** | **3** | **3** | **4** | **5** | **4** | **5** | **34** |
| 2 | Gonjo & Olstad [3] | **5** | **5** | **4** | **3** | **4** | **5** | **5** | **5** | **36** |
| 3 | Olstad et al. [46] | **5** | **5** | **4** | **3** | **5** | **5** | **5** | **5** | **37** |
| 4 | Seifert et al. [47] | **5** | **5** | **4** | **2** | **4** | **5** | **5** | **5** | **35** |
| 5 | Seifert et al. [48] | **5** | **5** | **4** | **2** | **4** | **5** | **5** | **5** | **35** |
